# Supplementary material
Source: PubMed Central journal article supplement (PMC3536296)
Supplement: ja308665g_si_001.pdf [file ja308665g_si_001.pdf]

## Supporting information

For

### An RNA hairpin to G-quadruplex conformational transition

Anthony Bugaut, Pierre Murat, and Shankar Balasubramanian

|                                                                                                                        |      |
|------------------------------------------------------------------------------------------------------------------------|------|
| Experimental procedures.....                                                                                           | pS2  |
| <b>Figure S1:</b> Rational design of <b>HpQd</b> .....                                                                 | pS3  |
| <b>Figure S2:</b> CD and TDS profiles of <b>Hp'</b> and <b>Qd'</b> .....                                               | pS4  |
| <b>Figure S3:</b> MFold predicted structure of <b>HpQd</b> .....                                                       | pS5  |
| <b>Figure S4:</b> Thermal denaturation studies.....                                                                    | pS6  |
| <b>Figure S5:</b> CD profiles of <b>HpQd</b> at different concentrations.....                                          | pS7  |
| <b>Figure S6:</b> <sup>1</sup> H NMR titration of <b>Qd'</b> and <b>Hp'</b> with an increasing amount of salts...pS8   |      |
| <b>Figure S7:</b> Summary of <sup>1</sup> H NMR titration experiments of <b>HpQd</b> .....                             | pS9  |
| <b>Figure S8:</b> <sup>1</sup> H NMR titration of <b>Qd'</b> and <b>Hp'</b> with an increasing amount of <b>1</b> .... | pS10 |
| <b>Figure S9:</b> <b>Qd</b> to <b>Hp</b> structural interconversion triggered by <b>1</b> .....                        | pS11 |
| <b>Figure S10:</b> Identified sequences with some homology to <b>HpQd</b> in the human transcriptome.....              | pS12 |

## Experimental procedures:

### *CD spectroscopy*

Circular dichroism experiments were conducted on a Chirascan spectropolarimeter using a quartz cuvette with an optical path length of 1 mm. Samples were prepared by diluting the oligonucleotides in the appropriate buffer, by heating them at 95 °C and then equilibrating at 4 °C for at least 12 h. Scans were performed over the range of 200-320 nm at 20 °C. Each trace is the result of the average of three scans taken with a step size of 1 nm, a time per point of 1 s and a bandwidth of 1 nm. A blank sample containing only buffer was treated in the same manner and subtracted from the collected data. The data were finally zero-corrected at 320nm.

### *UV spectroscopy*

UV melting curves were collected using a Varian Cary 400 Scan UV-visible spectrophotometer by following the absorbance at 260, 280 or 295 nm. Samples were transferred to a 1cm path-length quartz cuvette, covered with a layer of mineral oil, placed in the spectrophotometer and equilibrated at 5 °C for 10 minutes. Samples were then heated to 95 °C and cooled to 5 °C at a rate of 1 °C/min, with data collection every 1 °C during both melting and cooling.  $T_m$  values were obtained from the minimal of the first derivative of the melting curve. Thermal differential spectra were obtained by subtracting the UV spectra collected at 25 °C from the one collected at 80 °C of the oligonucleotide solutions.

### *<sup>1</sup>H NMR spectroscopy*

NMR spectra were recorded at 298 K using a 500 MHz Bruker Avance TCI spectrometer equipped with a cryogenic TCI ATM probe. Water suppression was achieved using excitation sculpting. The oligonucleotides were annealed at 100 μM in a 10mM PBS buffer (pH 7.0) by heating at 95 °C for 10 min. MgCl<sub>2</sub> and KCl were then added directly to the warm solution. The samples were then slowly cooled to room temperature and equilibrated at 4 °C for at least 24h.

Titration experiments with an increasing concentration of cations were performed by adding increasing amount of a 1 M solution of KCl or a 1 mM solution of MgCl<sub>2</sub>.

Titration experiments with the small molecule **1** were performed by adding increasing amount of a 10 mM solution of the TAP derivative.

During titration experiments several <sup>1</sup>H NMR spectra were acquired after the addition of the cations or molecule in order to check that the thermodynamic equilibrium was reached.

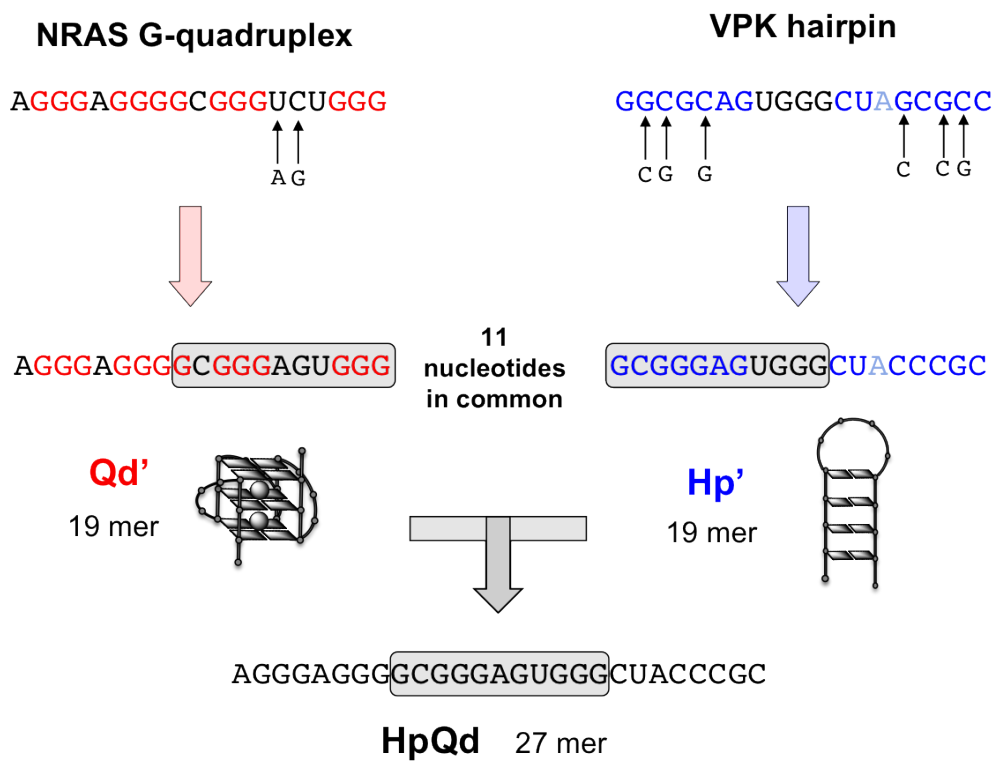

**Figure S1.** Rational design of the **HpQd** sequence.

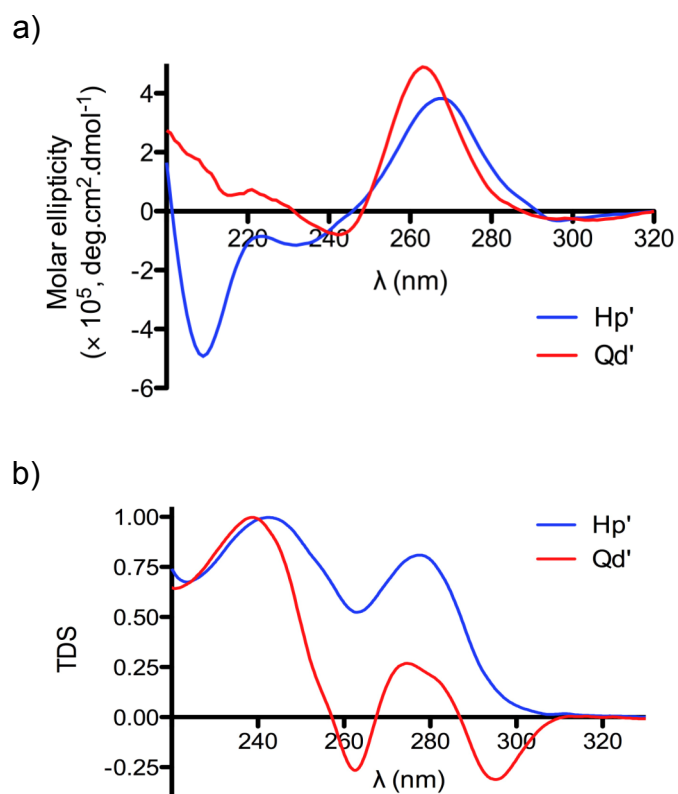

**Figure S2.** a) CD and b) TDS profiles of **Hp'** and **Qd'** in sodium cacodylate (pH 7.0), 10 mM KCl and 100  $\mu\text{M}$   $\text{MgCl}_2$ .

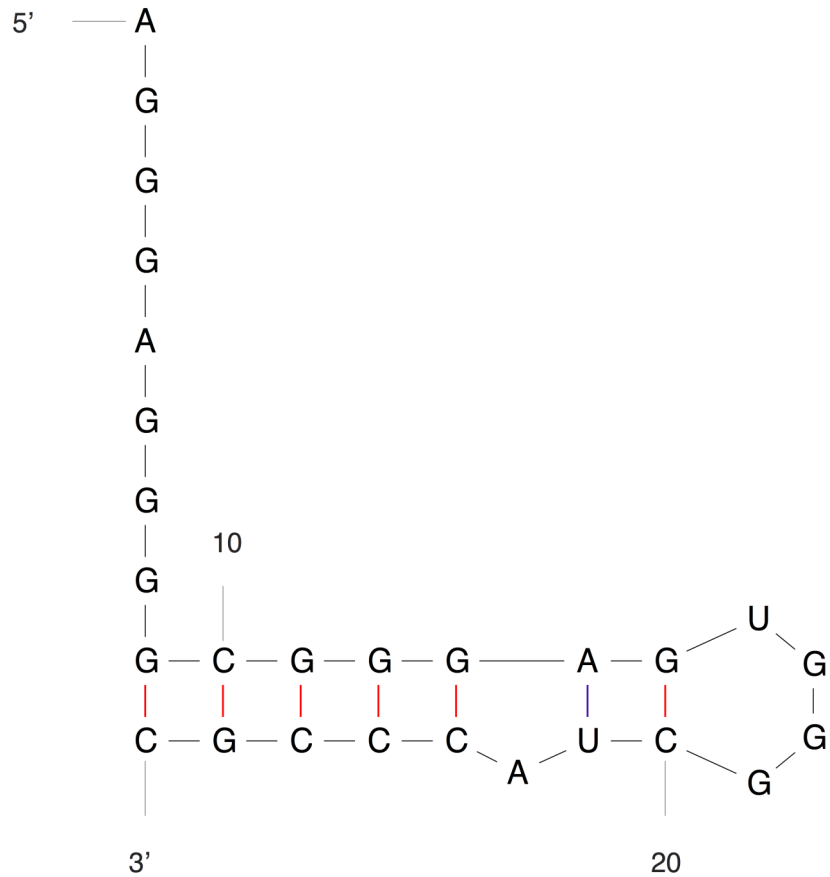

$dG = -9.70$  [Initially -9.70] HpQd

**Figure S3.** Most stable predicted structure of **HpQd** sequence using MFold RNA folding software (<http://mfold.rna.albany.edu/?q=mfold/RNA-Folding-Form>).

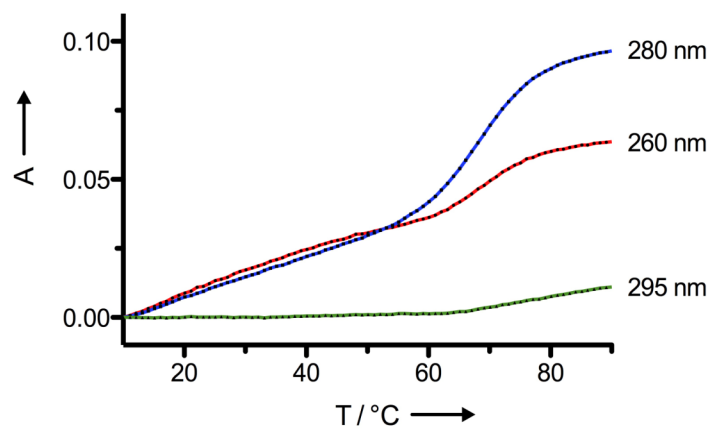

**Figure S4.** Thermal denaturation studies of **HpQd** in sodium cacodylate (pH 7.0), 1 mM KCl recorded at 280, 260 and 295 nm.

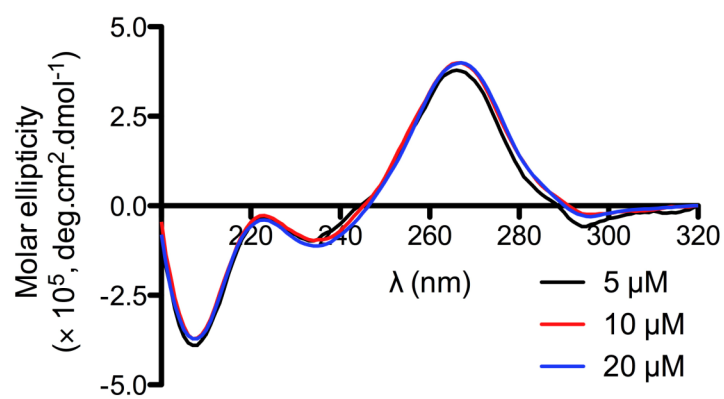

**Figure S5.** CD profile of **HpQd** in sodium cacodylate (pH 7.0) at different concentrations. The spectra were found to overlay indicating that the **HpQd** conformation is independent of **HpQd** concentration.

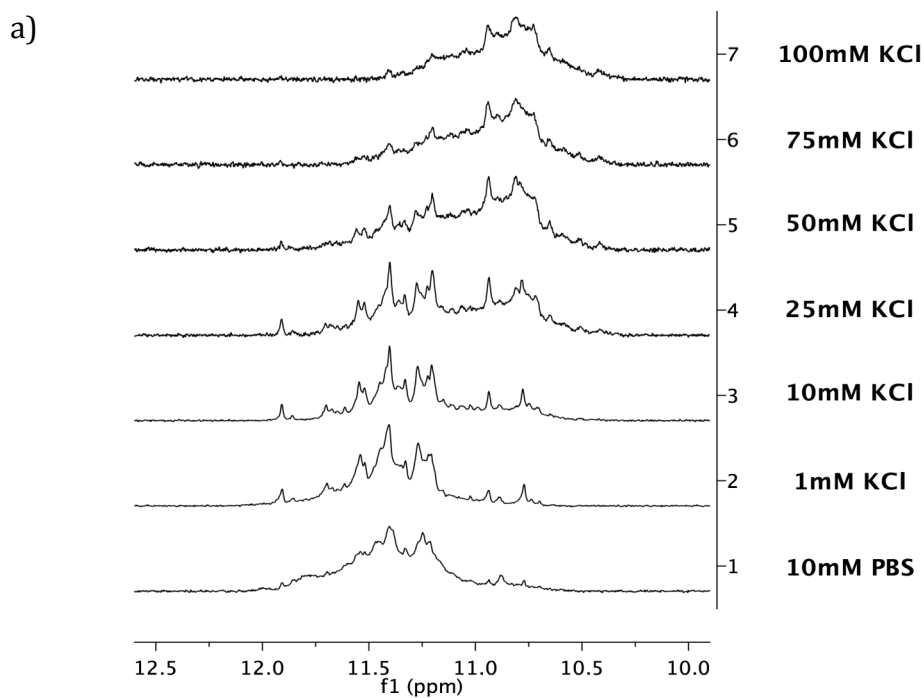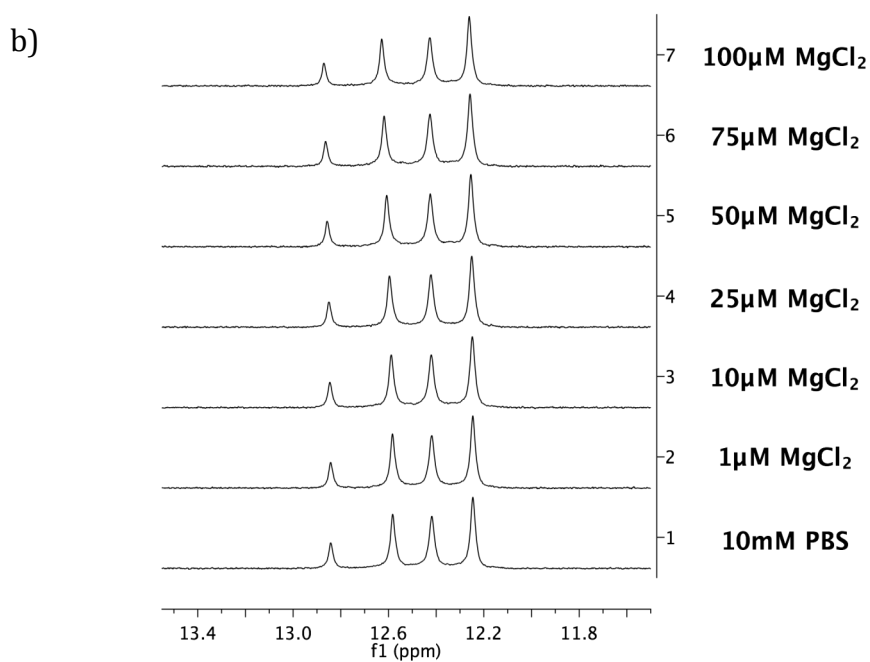

**Figure S6.** a)  $^1\text{H}$  NMR titration of **Qd'** with an increasing amount of KCl starting from 10 mM PBS. b)  $^1\text{H}$  NMR titration of **Hp'** with an increasing amount of  $\text{MgCl}_2$  starting from 10 mM PBS.



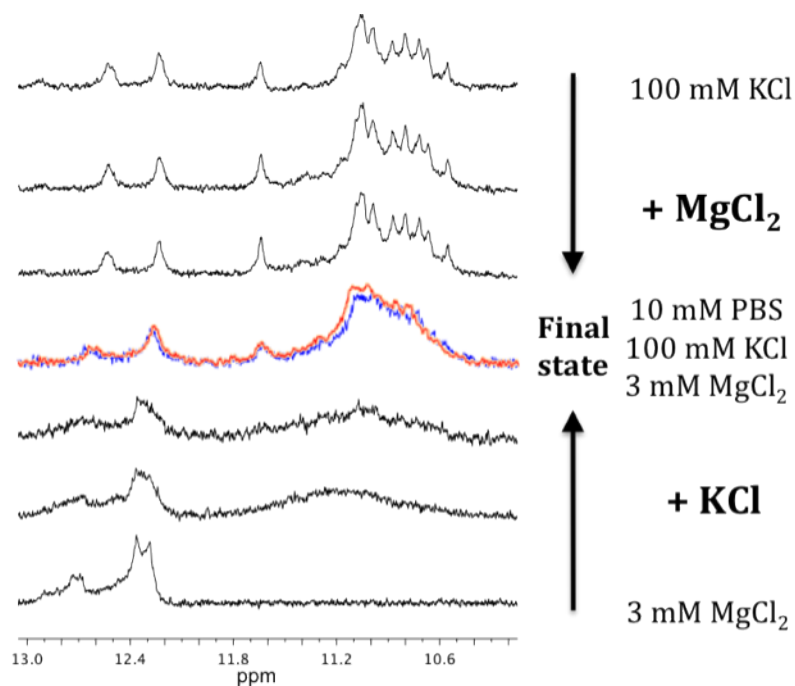

**Figure S7.** Summary of 1D  $^1\text{H}$  NMR titration experiments of **HpQd** with an increasing amount of either KCl or  $\text{MgCl}_2$  starting from two different initial states (presence of KCl or  $\text{MgCl}_2$ ). These experiments demonstrate that **HpQd** preferentially folds into a G-quadruplex conformation at near physiological condition independently of its initial state. The blue and red spectra were obtained while starting the titration with either the presence of KCl or  $\text{MgCl}_2$ , respectively. These two spectra were found to overlay showing that the conformations of **HpQd** at the end of both titrations are identical.

a)

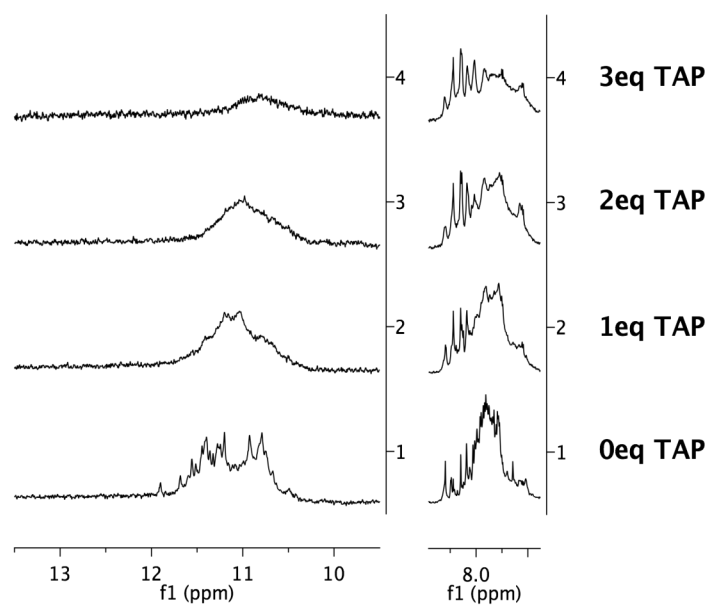

b)

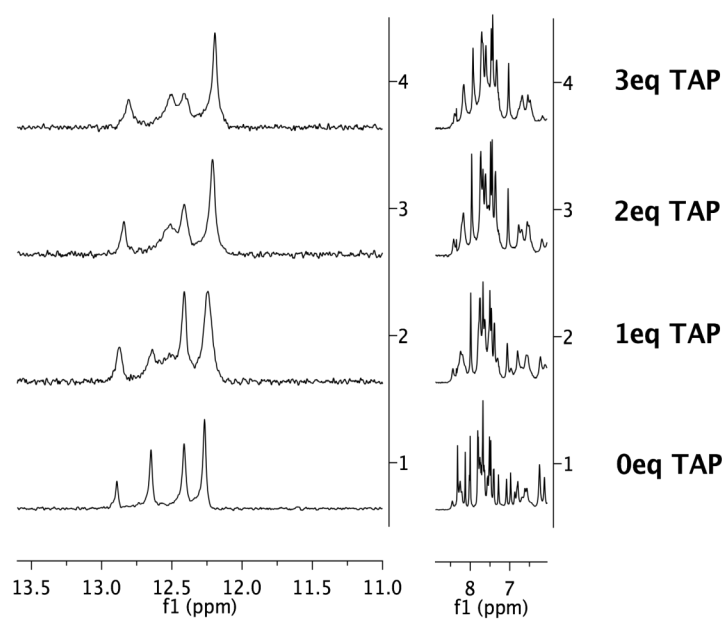

**Figure S8** – <sup>1</sup>H NMR titration of a) **Qd'** and b) **Hp'** with an increasing amount of the triarylpyridine derivative **1** (TAP) in 10 mM PBS pH 7.0, 10mM KCl and 200μM MgCl<sub>2</sub>.

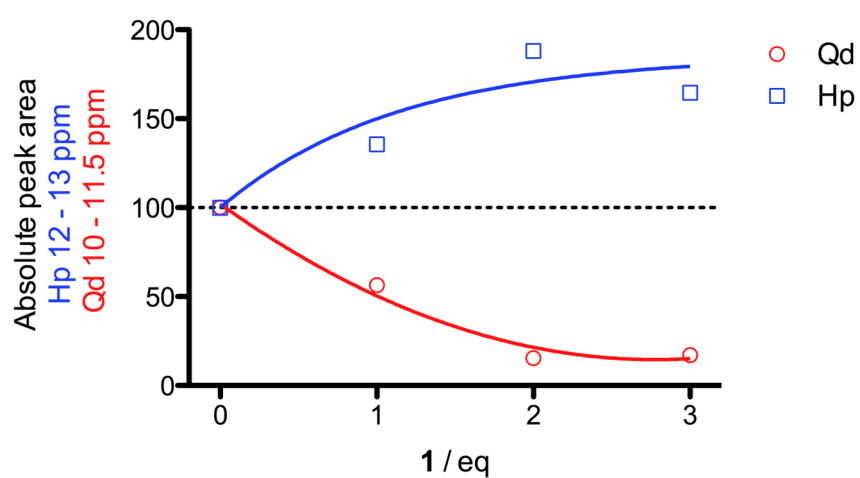

**Figure S9** – Change of the absolute area of imino envelopes relative to **Hp** (12 – 13 ppm) in blue and to **Qd** (10 – 11.5 ppm) in red in the  $^1\text{H}$  NMR spectra of **HpQd** while titrated by an increasing amount of **1**. The NMR spectra are depicted in **Figure 5** in the manuscript.

Calcium/calmodulin-dependent protein kinase 1  
**CAMKK1**

mRNA : ggggggcgggaguggggcugcagucccc

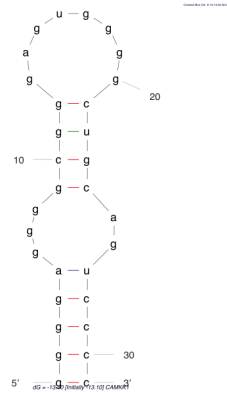

POU domain class 5, transcription factor 2  
**POU5F2**

mRNA : uggcuggggcagaggagugggcuaccccu

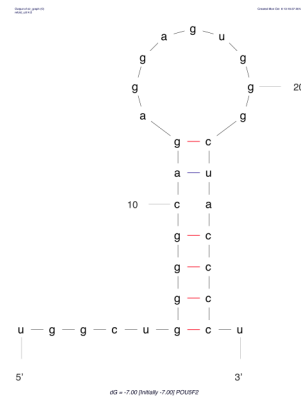

Guanine nucleotide-binding protein G(olf) subunit alpha  
**GNAL**

mRNA : cggaggggcgggagggggcugcacccgg

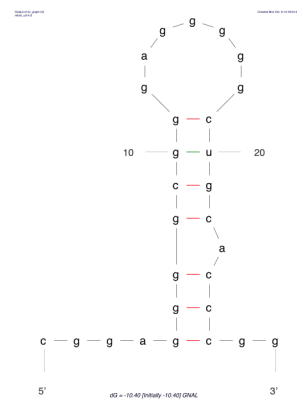

**Figure S10** – The **HpQd** sequence was not found in the human transcriptome. Nevertheless G-rich sequences presenting some homology with **HpQd** were found. The nucleotides in red are identical to the **HpQd** sequence. MFold-predicted structures are presented to show the ability of these sequences to fold into hairpin structures. These G-rich sequences also possess the ability to fold into G-quadruplexes (underlined nucleotides).
